# Supplementary material for: Pharmacokinetics of vitamin E, γ-oryzanol, and ferulic acid in healthy humans after the ingestion of a rice bran-enriched porridge prepared with water or with milk
Source: Springer Nature journal article supplement (doi:10.1007/s00394-018-1770-6), 2018-07-05
Supplement: MOESM3 [file 15911024]

**Supplemental Table 3**. Intra- and interday recovery, accuracy and precision of ferulic acid (FA) and γ-oryzanol (ORY) extracted from human plasma or urine spiked at low, medium, or high concentrations (0.1, 2.5, and 50 µg/ml for FA; and 5, 100 and 500 µg/ml for ORY, respectively; n = 3 for each concentration) detected by HPLC at 320 nm 1.

|  | Plasma | |  | Urine | |
| --- | --- | --- | --- | --- | --- |
|  | FA | ORY |  | FA | ORY |
| *Intraday recovery [%]* |  |  |  |  |  |
| Low | 91.27 | 78.45 |  | 103.34 | 114.00 |
| Medium | 100.55 | 99.69 |  | 110.71 | 104.99 |
| High | 124.14 | 99.42 |  | 86.50 | 96.08 |
|  |  |  |  |  |  |
| *Interday recovery [%]* |  |  |  |  |  |
| Low | 116.56 | 103.43 |  | 83.77 | 92.17 |
| Medium | 103.42 | 97.38 |  | 109.61 | 103.93 |
| High | 115.30 | 106.23 |  | 81.23 | 114.36 |
|  |  |  |  |  |  |
| *Intraday precision [% CV]* |  |  |  |  |  |
| Low | 11.75 | 13.12 |  | 22.00 | 29.93 |
| Medium | 5.26 | 5.20 |  | 15.41 | 3.23 |
| High | 5.71 | 11.77 |  | 6.03 | 5.81 |
|  |  |  |  |  |  |
| *Interday precision [% CV]* |  |  |  |  |  |
| Low | 10.83 | 14.94 |  | 26.72 | 18.91 |
| Medium | 8.21 | 3.88 |  | 9.65 | 5.95 |
| High | 43.93 | 6.20 |  | 7.75 | 22.54 |
|  |  |  |  |  |  |
| *Intraday accuracy [bias % ]* |  |  |  |  |  |
| Low | 6.91 | 3.27 |  | 8.34 | 4.61 |
| Medium | 7.41 | 3.55 |  | 11.11 | 5.68 |
| High | 7.62 | 3.76 |  | 7.18 | 5.33 |
|  |  |  |  |  |  |
| *Interday accuracy [bias %]* |  |  |  |  |  |
| Low | 7.50 | 3.35 |  | -11.63 | -21.74 |
| Medium | 7.27 | 3.61 |  | -7.04 | -17.75 |
| High | 6.69 | 14.79 |  | 9.80 | 4.21 |

1. FA, ferulic acid; ORY, γ-oryzanol; CYF, cycloartenyl ferulate; 24-MCF, 24-methylenecycloartanyl ferulate; CAF, campesteryl ferulate; β-SF, β-sitosteryl ferulate.
